# Supplementary material for: A high sensitivity prostate-specific antigen SERS detection platform based on laser resonance nanoparticles
Source: Royal Society of Chemistry journal article supplement (doi:10.1039/d4nr04510f), 2025-01-01
Supplement: d4nr04510f1.pdf [file d4nr04510f1.pdf]

## Supporting Information

### High sensitivity prostate-specific antigen SERS detection platform based on laser resonance nanoparticles

Shi-Ying Fu,<sup>a</sup> Shanshan Xu,<sup>a</sup> Hongmei Li,<sup>a</sup> Xian-Ming Guo,<sup>a</sup> Jia-Sheng Lin,<sup>a</sup> Bing Guan<sup>a</sup>, Bin Chen,<sup>a</sup> Tao Wang,<sup>\*a</sup> Yue-Jiao Zhang<sup>\*a</sup> and Jian-Feng Li<sup>\*a,b</sup>

a. The Key Laboratory of Urinary Tract Tumours and Calculi, Department of Urology, The First Affiliated Hospital of Xiamen University, School of Medicine, College of Chemistry and Chemical Engineering, College of Energy, and Discipline of Intelligent Instrument and Equipment, Xiamen University, Xiamen 361005, China.

b. Scientific Research Foundation of State Key Laboratory of Vaccines for Infectious Diseases, Xiang An Biomedicine Laboratory, Xiamen 361005, China

\*Emails: taowang@xmu.edu.cn (T. Wang); zhangyuejiao@xmu.edu.cn (Y.-J. Zhang); Li@xmu.edu.cn (J.-F. Li).

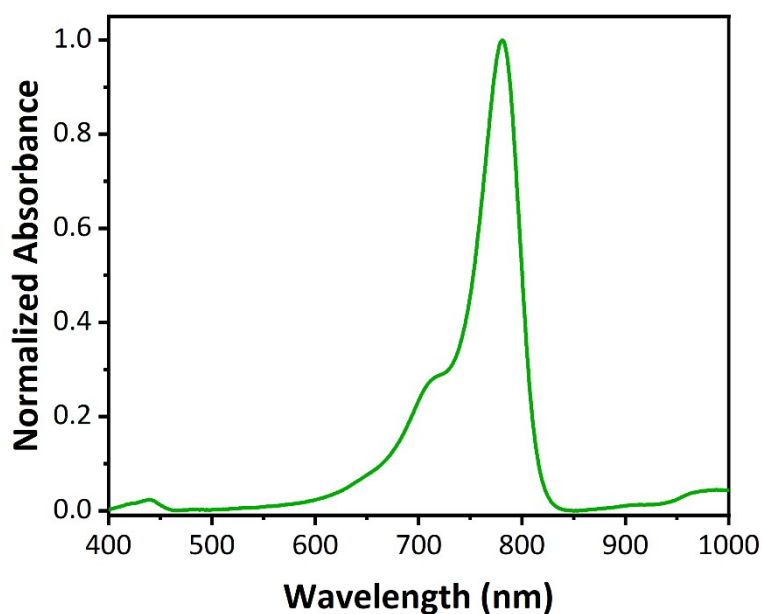

**Figure S1.** UV-vis spectrum of IR808.

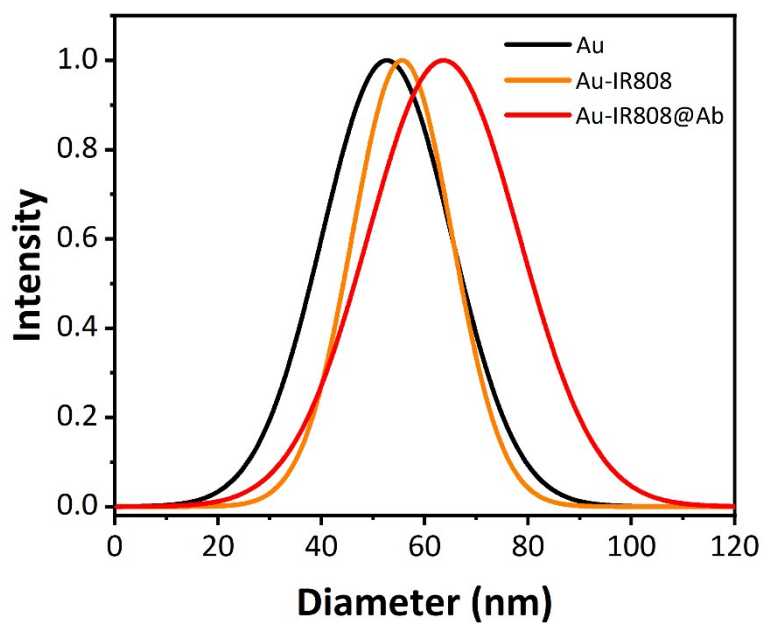

**Figure S2.** DLS distribution of AuNPs (black), Au-IR808(yellow) and Au-IR808@Ab(red).

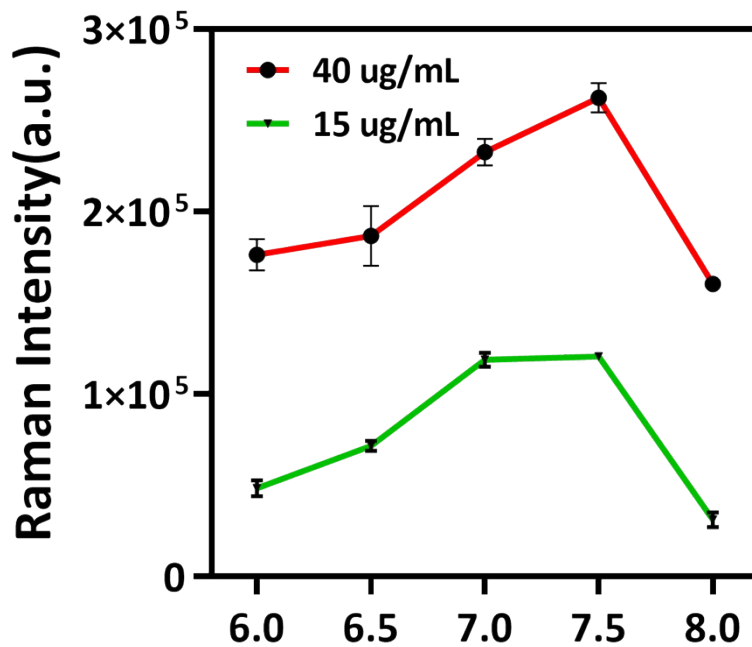

**Figure S3.** The effect of pH on the detection of magnetic beads modified with different amounts of antibodies.

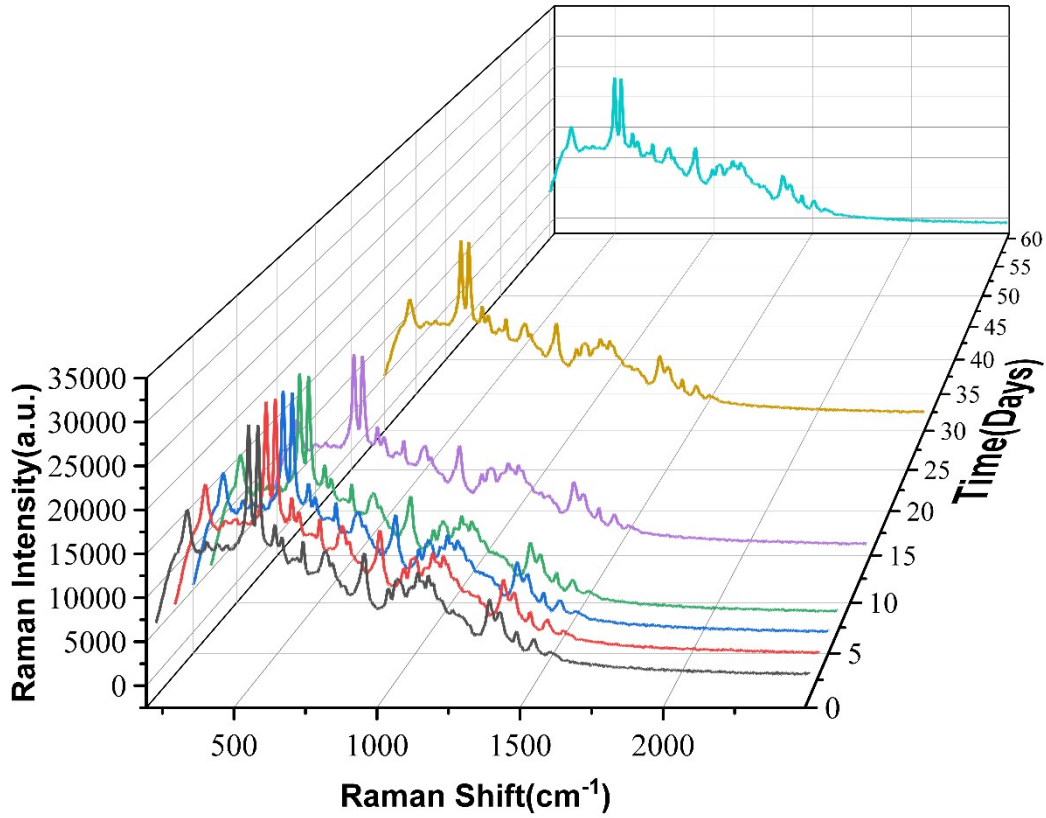

Figure S4. Time stability of antibody signalling gold.

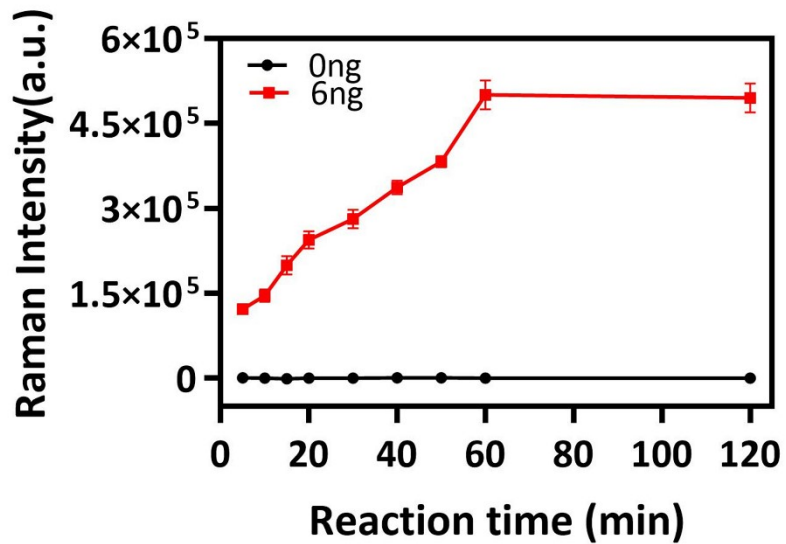

Figure S5. Effective reaction time analysis. The antigen concentration was 0 ng/mL (control) or 6 ng/mL (specimen).

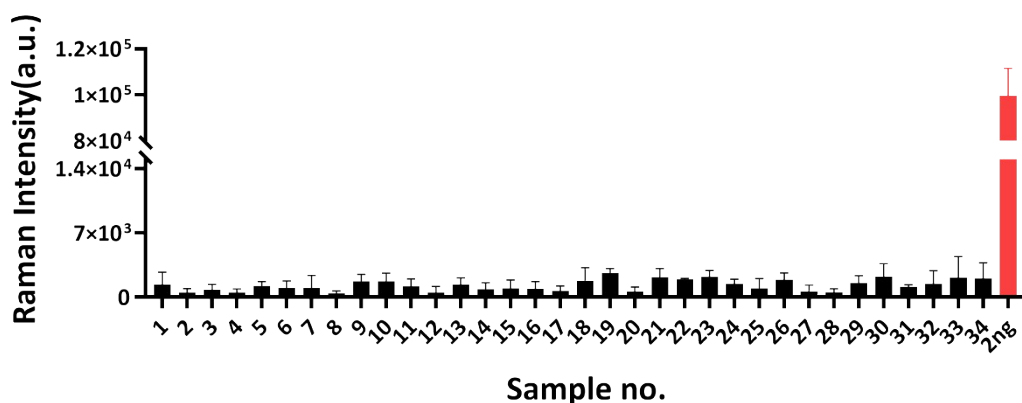

**Figure S6.** Detection of female serum samples.

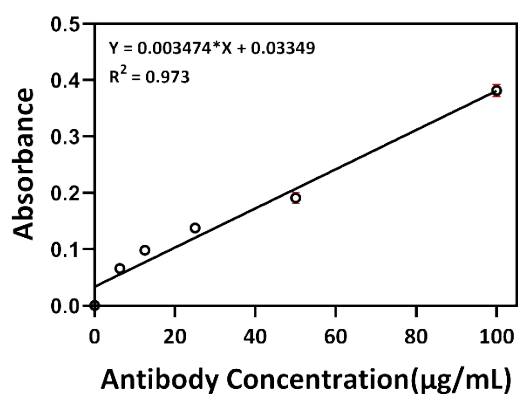

**Figure S7.** Calibration curve for quantitative detection of BCA protein for quantifying antibodies.

**Table S1.** Calculation of the percentage of antibodies loaded on AuNPs and MB.

|       | Added Antibody Concentration ( $\mu\text{g/mL}$ ) | Supernatant Absorbance | Supernatant Concentration ( $\mu\text{g/mL}$ ) | Percentage of antibody loading |
|-------|---------------------------------------------------|------------------------|------------------------------------------------|--------------------------------|
| AuNPs | 20                                                | 0.076                  | 12.33                                          | 38.35%                         |
| MB    | 40                                                | 0.074                  | 11.56                                          | 71.1%                          |

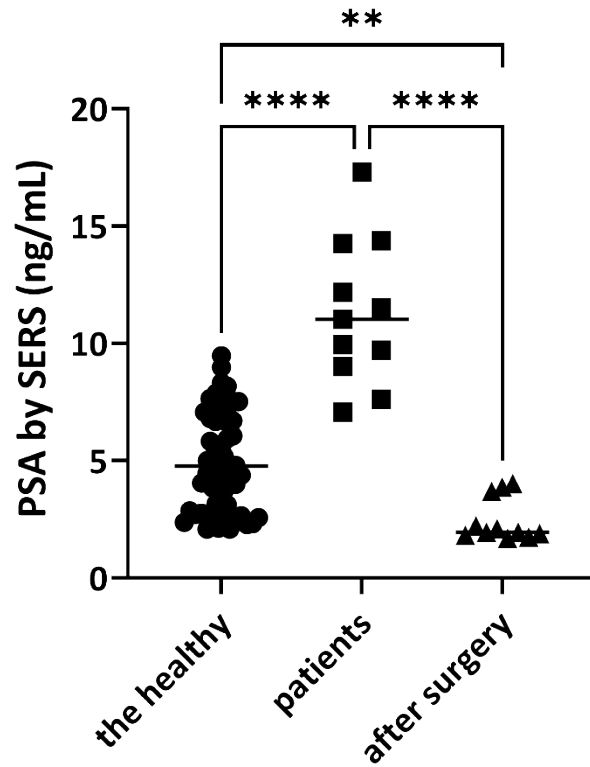

**Figure S8.** The level distribution of prostate-specific antigen (PSA) in serum of different population (healthy subjects, patients, after surgery patients) by surface-enhanced Raman spectroscopy (SERS) detection.
